# Supplementary material for: Effects of aerobic exercise on event-related potentials related to cognitive performance: a systematic review
Source: PeerJ journal article supplement (doi:10.7717/peerj.13604), 2022-07-11
Supplement: ROB_1_.pdf [file ROB_1_.pdf]

## Risk of bias

|                        | Sequence generation | Allocation concealment | Blinding of participants, personnel and outcome assessors | Incomplete outcome data | Selective outcome reporting | Other sources of bias | Overall judgment |
|------------------------|---------------------|------------------------|-----------------------------------------------------------|-------------------------|-----------------------------|-----------------------|------------------|
| Xie et al. 2020        | Green               | Red                    | Red                                                       | Yellow                  | Blue                        | Green                 | Red              |
| Wang et al. 2017       | Yellow              | Red                    | Red                                                       | Yellow                  | Blue                        | Green                 | Red              |
| Tsai et al. 2013       | Red                 | Red                    | Red                                                       | Yellow                  | Blue                        | Green                 | Red              |
| Yagi et al. 1999       | Red                 | Red                    | Red                                                       | Yellow                  | Blue                        | Red                   | Red              |
| Pedroso et al. 2018    | Red                 | Red                    | Red                                                       | Green                   | Blue                        | Red                   | Red              |
| Chang et al. 2016      | Green               | Red                    | Red                                                       | Yellow                  | Blue                        | Green                 | Red              |
| Walsh et al. 2019      | Green               | Red                    | Red                                                       | Blue                    | Blue                        | Green                 | Red              |
| Scudder et al. 2012    | Green               | Red                    | Red                                                       | Blue                    | Blue                        | Green                 | Red              |
| Tsai et al. 2017       | Green               | Red                    | Red                                                       | Green                   | Blue                        | Green                 | Red              |
| Swatridge et al. 2017  | Green               | Red                    | Red                                                       | Green                   | Blue                        | Green                 | Red              |
| Olson et al. 2017      | Green               | Red                    | Red                                                       | Green                   | Blue                        | Green                 | Red              |
| Chacko et al. 2020     | Green               | Red                    | Red                                                       | Green                   | Blue                        | Green                 | Red              |
| Akatsuka et al. 2015   | Green               | Red                    | Red                                                       | Blue                    | Blue                        | Green                 | Red              |
| Kamijo et al. 2009     | Green               | Red                    | Red                                                       | Green                   | Blue                        | Yellow                | Red              |
| Kao et al. 2020        | Green               | Red                    | Red                                                       | Green                   | Blue                        | Green                 | Red              |
| Aly et al. 2020        | Yellow              | Red                    | Red                                                       | Blue                    | Blue                        | Green                 | Red              |
| Tsai et al. 2018       | Yellow              | Red                    | Red                                                       | Blue                    | Blue                        | Green                 | Red              |
| Wollseifen et al. 2016 | Red                 | Red                    | Red                                                       | Blue                    | Blue                        | Red                   | Red              |
| Overath et al. 2014    | Red                 | Red                    | Red                                                       | Green                   | Blue                        | Red                   | Red              |

|                        |             |     |     |             |            |             |     |
|------------------------|-------------|-----|-----|-------------|------------|-------------|-----|
| Chang et al. 2015      | Light Green | Red | Red | Light Blue  | Light Blue | Light Green | Red |
| Wen et al. 2020        | Yellow      | Red | Red | Light Green | Light Blue | Light Green | Red |
| Chu et al. 2015        | Light Green | Red | Red | Light Blue  | Light Blue | Light Green | Red |
| Shibasaki et al. 2019  | Red         | Red | Red | Light Blue  | Light Blue | Red         | Red |
| Milankov et al. 2012   | Red         | Red | Red | Light Blue  | Light Blue | Red         | Red |
| Ligeza et al. 2018     | Light Green | Red | Red | Light Green | Light Blue | Light Green | Red |
| Pontifex et al. 2016   | Light Green | Red | Red | Light Green | Light Blue | Light Green | Red |
| Chen et al. 2020       | Yellow      | Red | Red | Light Blue  | Light Blue | Light Green | Red |
| Kamijo et al. 2007     | Red         | Red | Red | Light Green | Light Blue | Red         | Red |
| Wang et al. 2020       | Light Green | Red | Red | Light Blue  | Light Blue | Light Green | Red |
| Chu et al. 2017        | Light Green | Red | Red | Light Blue  | Light Blue | Light Green | Red |
| Zhou et al. 2019       | Light Green | Red | Red | Light Green | Light Blue | Light Green | Red |
| Rietz et al. 2018      | Light Green | Red | Red | Light Green | Light Blue | Light Green | Red |
| Thermanson et al. 2006 | Light Green | Red | Red | Light Blue  | Light Blue | Light Green | Red |
| Dimitrova et al. 2016  | Yellow      | Red | Red | Light Green | Light Blue | Red         | Red |
| Kao et al. 2017        | Light Green | Red | Red | Light Green | Light Blue | Light Green | Red |
| Zhao et al. 2020       | Yellow      | Red | Red | Light Green | Light Blue | Light Green | Red |
| Won et al. 2017        | Light Green | Red | Red | Yellow      | Light Blue | Light Green | Red |
| Özkaya et al. 2005     | Yellow      | Red | Red | Light Blue  | Light Blue | Light Blue  | Red |
| Brush et al. 2020      | Light Green | Red | Red | Light Green | Light Blue | Light Green | Red |
| Bae et al. 2019        | Light Green | Red | Red | Light Blue  | Light Blue | Light Green | Red |
| Hwang et al. 2018      | Red         | Red | Red | Light Green | Light Blue | Red         | Red |
| Magnie et al. 2000     | Red         | Red | Red | Light Blue  | Light Blue | Red         | Red |

|                      |        |     |     |       |      |       |     |
|----------------------|--------|-----|-----|-------|------|-------|-----|
| Gajewski et al. 2017 | Yellow | Red | Red | Green | Blue | Blue  | Red |
| Drapsin et al. 2012  | Red    | Red | Red | Blue  | Blue | Red   | Red |
| Kao et al. 2018      | Green  | Red | Red | Blue  | Blue | Green | Red |
| Tsai et al. 2019     | Green  | Red | Red | Green | Blue | Green | Red |
| Wu et al. 2019       | Green  | Red | Red | Green | Blue | Green | Red |
| Jain et al. 2014     | Green  | Red | Red | Blue  | Blue | Green | Red |
| Winneke et al. 2019  | Green  | Red | Red | Blue  | Blue | Green | Red |
| Nakamura et al. 1999 | Red    | Red | Red | Green | Blue | Red   | Red |
| Yagi et al. 1998     | Red    | Red | Red | Red   | Blue | Red   | Red |
| Takuro et al. 2009   | Green  | Red | Red | Red   | Blue | Green | Red |

Green: low risk

Yellow: unclear

Red: high risk

Blue: no information
