# Supplementary material for: Effects of aerobic exercise on event-related potentials related to cognitive performance: a systematic review
Source: PeerJ. 2022 Jul 11;10:e13604. doi: 10.7717/peerj.13604 (PMC9281596; doi:10.7717/peerj.13604)
Supplement: Supplemental Information 4 [file peerj-10-13604-s004.xlsx]

## Sheet: Ark1
	1	2	3	4	5	6	7	8	9	10	11	12	13	14	15	16	17	18	19	20	21	22	23	24	25	26	27	28	29	30	31	32	33	34	35	36	37	38	39	40	41	42	43	44	45	46	47	48	49
Variables																		Skrevet til main author	Skrevet til main author																							No corresponding authors (kom tilbage)	Skrevet til main author
Title	Acute High-Intensity Interval Exercise Improves Inhibitory Control Among Young Adult Males With Obesity	Aerobic exercise training ameliorates craving and inhibitory control in methamphetamine dependencies- A randomized controlled trial and event-related potential study	Impact of acute aerobic exercise and cardiorespiratory fitness on visuospatial attention performance and serum BDNF levels	Effects of aerobic exercise and gender on visual and auditory P300, reaction time, and accuracy.	Effects of Physical Exercise on the P300 of Elderly With Alzheimer’s Disease	Acute exercise has a general facilitatitve effect on cognitive function: A combined ERP temporal dynamics and BDNF study	High-intensity interval exercise impairs neuroelectric indices of reinforcement-learning	Neuroelectric indices of goal maintenance following a single bout of physical activity	Open- and Closed-Skill Exercise Interventions Produce Different Neurocognitive Effects on Executive Functions in the Elderly: A 6-Month Randomized, Controlled Trial	The Acute Effects of Aerobic Exercise on Cognitive Control among People with Chronic Stroke	A randomized trial of aerobic exercise on cognitive control in major depression	A single bout of vigorous-intensity aerobic exercise affects reactive, but not proactive cognitive brain functions	Acute aerobic exercise influences the inhibitory process in the go/no-go task in humans	Acute Effects of Aerobic Exercise on Cognitive Function in Older Adults	Acute effects of aerobic exercise on response variability and neuroelectric T indices during a serial n-back task	Acute moderate-intensity exercise generally enhances neural resources related to perceptual and cognitive processes: A randomized controlled ERP study	An acute bout of aerobic or strength exercise specifically modifies circulating exerkine levels and neurocognitive functions in elderly individuals with mild cognitive impairment	The effect of 6 h of running on brain activity, mood, and cognitive performance	Does an aerobic endurance programme have an influence on information processing in migraineurs?	Antecendent acute cycling exercise affects attention control: an ERP study using attention network test	Effects of Acute Aerobic Exercise Combined with Resistance Exercise on Neurocognitive Performance in Obese Women	Effects of acute aerobic exercise on motor response inhibition: An ERP study using the stop-signal task	Effects of repetitive exercise and thermal stress on human cognitive processing	Event related potentials after acute bouts of exercise at different intensities in female non athletes and their relationship with sex hormones	Moderate-intensity exercise boosts the N2 neural inhibition marker: A randomized and counterbalanced ERP study with precisely controlled exercise intensity	Single Bouts of Exercise Selectively Sustain Attentional Processes	The effects of aerobic exercise on working memory in methamphetamine- T dependent patients: Evidence from combined fNIRS and ERP	The interactive effect of exercise intensity and task difficulty on human cognitive processing	Acute Aerobic Exercise Ameliorates Cravings and Inhibitory Control in Heroin Addicts- Evidence From Event-Related Potentials and Frequency Bands	Acute Exercise and Neurocognitive Development in Preadolescents and Young Adults- An ERP Study.	Acute Moderate-Intensity Exercise Generally Enhances Attentional Resources Related to Perceptual Processing	Beneficial effects of acute high-intensity exercise on electrophysiological indices of attention processes in young adult men	CARDIORESPIRATORY FITNESS AND ACUTE AEROBIC EXERCISE EFFECTS ON NEUROELECTRIC AND BEHAVIORAL MEASURES OF ACTION MONITORING	Comparing the effects of an acute bout of physical exercise with an acute bout of interactive mental and physical exercise on electrophysiology and executive functioning in younger and older adults	Comparison of the acute effects of high-intensity interval training and continuous aerobic walking on inhibitory control	Effects of chronic exercise on temporal discounting among persons with methamphetamine use disorder	Executive Function and the P300 after Treadmill Exercise and Futsal in College Soccer Players	Effect of strength and endurance training on cognition in older people	A randomized trial of aerobic exercise for major depression: examining neural indicators of reward and cognitive control as predictors and treatment targets	Effects of Acute Aerobic Exercise on Cognitive Flexibility Required During Task-Switching Paradigm	Effects of aerobic exercise on sad emotion regulation in young women: an electroencephalograph study	P300, N400, aerobic fitness, and maximal aerobic exercise	ERP and Behavioral Effects of Physical and Cognitive Training on Working Memory in Aging: A Randomized Controlled Study	Physical exercise and its influence on evoked cognitive potentials in the female subjects	The acute effects of high-intensity interval training and moderate-intensity continuous exercise on declarative memory and inhibitory control	Distinctive Effects of Aerobic and Resistance Exercise Modes on Neuro-cognitive and Biochemical Changes in Individuals with Mild Cognitive Impairment	Effects of acute aerobic and resistance exercise on executive function: An ERP study	Influences of affective changes on Behavioral and Cognitive Performances After Acute Bout of Exhaustive Exercise	Moderate Cardiovascular Exercise Speeds Up Neural Markers of Stimulus Evaluation During Attentional Control Processes
Authors	Xie et al.	Zwierko	Tsai et al.	Yagi et al.	Pedroso et al.	Chang et al.	Walsh et al.	Scudder et al.	Tsai et al.	Swatridge et al.	Olson et al.	Chacko et al.	Akatsuka et al.	Kamijo et al.	Kao et al.	Aly et al.	Tsai et al.	Wollseiffen et al.	Overath et al.	Chang et al.	Wen et al.	Chu et al.	Shibasaki et al.	Milankov et al.	Ligeza et al.	Pontifex et al.	Chen et al.	Kamijo et al.	Wang et al.	Chu et al.	Zhou et al.	Rietz et al.	Themanson et al.	Dimitrova et al.	Kao et al.	Zhao et al.	Won et al.	Özkaya et al.	Brush et al.	Bae et al.	Hwang et al.	Magnie et al.	Gajewski et al.	Drapsin et al.	Kao et al.	Tsai et al.	Wu et al.	Jain et al.	Winneke et al.
Year of publication	2020	2017	2013	1999	2018	2016	2019	2012	2017	2017	2017	2020	2015	2009	2020	2020	2018	2016	2014	2015	2020	2015	2019	2012	2018	2016	2020	2007	2020	2017	2019	2018	2006	2016	2017	2020	2017	2005	2020	2019	2018	2000	2017	2012	2018	2019	2019	2014	2019
Study ID
Comments		Participants are imprisoned																					The study investigates thermal effect on outcome, i have only extracted data from the experiment carried out at 20°C	This study investigated the effect of menstrual cycle fase on ERP following exercise						this study reports results from young adults separatly from preadolescents and only data from the young adults group will be shown in this extraction sheet
Demographics
Number of participants (post test)	16	50	60	24	50	30	25	37	64	9	30	15	10	24 (older=12 younger=12)	23	40	66	11	28	30	32	21	15	10	18	34	44	12	60	20	72	26	28	56	64	64	12	44	55	29	30	20	141	24	36	55	30	12	11
Gender (male percentage)	100	88	100	50	FE: 40. SG: 31. HC: 36.	57	36	51	100	67	20	53	100	100	48	70	42	45	17	53 (both in EG and CG)	0	90	100	0	100	47	not stated	100	100	90	50	100	50	54	42	100	100	68	32	48	0	100	40	0	50	31	57	100	36
Age of participants (mean (SD) unless specified othervise)	24,5 ± 5,09	IG: 32,3 ± 6,97 CG: 34,76 ± 7,96	EI(H): 22.20 ± 2.17. EI(L): 23.10 ± 2.20. NEI: 22.20 ± 1.70	20 ± 2	FE and SG group: 78,0 ± 5,6. CG: 74,6 ± 5,3.	22.67 ± 1.52	22,4 ± 3,5	19,7 ± 1,3	Open-skill ex group: 66.88 ± 4.74. Closed-skill ex group: 66.15 ± 4.90. Control: 65.70 ± 3.54.	57,8 ± 11,4	21,1 ± 2,0 years	26,8 ± 5,1	19,8 (SD not stated)	Older: 65,5 ± 1,5. Younger: 21.8 ± 0.6	19.2 ± 0.6	CG: 23.10 ± 2.20. IG: 22.90 ± 2.40	AE: 65.48 ± 7.53. RE: 66.05 ± 6.64. control: 64.50 ± 6.95	36,5 ± 7	43,3 ± 9,7	EG: 21.67 ± 3.77. CG: 20.17 ± 1.53	EG: 33,13 ± 6,27 CG: 32.92 ± 7.17	21.50 ± 4.68	20.8 ± 0.9	22.4 average, range 19-24	24,9 ± 2,2	19.3 ± 0.9 years	Control: 33.87 ± 1.98. High-intensity: 32.73 ± 1.31. Moderate intensity: 29.40 ± 1.19	25,7 ± 0,7	exercise: 32.73 ± 7.15 control: 32.40 ± 7.76	20,42 ± 1,16	20.07 ± 0.15	21,5 ± 2,52	higher fit: 20.1 ± 1.7. Lower fit: 20.6 ± 2.4	younger: 23.2 ± 2.7. Older: 70.7 ± 5.4	19,2 ± 0,8	29.38 ± 0.56	24.8 ± 2 years	C: 72,3 ± 2,1. ST: 75,8 ± 2,8. ET: 70,9 ± 3,1	20,23 ± 2,39	21,4 ± 1,2	20,4 range 18-22	high ex group: 21,2. low ex group: 22,9. No SD	70.9 ±5.2	judo players: 20,61 ± 3,09. healthy: 21,06 ± 4,09	21,5 ± 3,1	AE: 66,00 ± 7,68. RE: 65,44 ± 6,76. Control: 65,17 ± 7,00.	21.17 ± 1.32	between 18 and 21	25.64 ± 3.78
Diagnosis		Methamphetamin dependency			FE and SG: Alzheimers disease					Chronic stroke	Major depressive disorder						Mild cognitive impairment (amnestic)		Migraine								Methamphetamin-dependency		Heroin addiction							Methamphetamin dependency			Major depression							Mild cognitive impairment
Comments	Only obese men eligible for study (>28kg/m^2)		EI(H): exercise intervention higher fit. EI(L): exercise intervention lower-fit. NEI: no intervention		FE: Functional exercise. SG: social gathering. HC: healthy control.					≥ 6 months post stroke				The participans were divided in two groups according to age (young vs old)			AE: aerobic exercise group. RE: resistance exercise group.	the participants were individuals who were specifically trained and experienced in ultra-marathon running		Highly fit basketball players	BMI EG: 30,83 ± 3,61 CG: 31,07 ± 6,08												The group was divided in lower fit and higher fit adults according to VO2max achieved during graded exercise test (GXT)	The group was divided in younger adults and older adults				Strengt training: ST. Endurance training: ET. Control: C				Subjects were divided in high- and low exercise group. High=cyclists. Low=sedentary		participants were divided in two groups: judo players (14) and healthy young women		AE: aerobic exercise group. RE: resistant exercise group.
Study characteristics
Study type	Counterbalanced within-subject design	Parallel group RCT	Parallel group design	Single group design	Parallel group design	Single group counterbalanced design	Single group counter-balanced design	Counterbalanced within-subject design	Parallel group design	Counterbalanced within-subject design	Parallel group design	Counterbalanced within-subject design	Counterbalanced within-subject design	Counterbalanced within-subject design	Counterbalanced withing-subject design	Parallel group design	Parallel group design	Single group design	Single group design	Parallel group design	parallel group design	Counterbalanced within-subject design	Single group design	single group design	Counterbalanced within-subject design	Counterbalanced within-subject design	Parallel group design	Counterbalanced within-subject design	Parallel group design	Counterbalanced within-subject design	Parallel group design	Counterbalanced within-subject design	Counterbalanced within-subject design	Parallel group design	counterbalanced within-subject design	Parallel group design	Counterbalanced within-subject design	Parallel group design	Parallel group design	Counterbalanced within-subject design	single group design	single group design	parallel group design	Single group design	counterbalanced within-subject design	Parallel group design	counterbalanced within-subject design	counterbalanced withing-subject design	counterbalanced within-subject design
Comparator description
Number of comparator groups/conditions	1	1	1		2	1	1	1		1	1	1			1	1	2	none	none	1	1	1	none	none	1	1	1	0	1	1	1	1	1	0	1	1	1	2	1	1	0	0	3	0	1	2	2	1	1
Recieved tasks instead of exercise
Group/condition 1	Sedentary	Usual care	rest and magazine reading		Healthy control group	sedentary reading	Nature documentary watching and rest	paper reading	Balance and stretching	Rest	Light-intensity stretching	Internet browsing	20 min rest		rest	Inactive resting	Rest and magazine reading 45 min			book reading	Sitting quietly	sedentary (reading)			sitting and reading sports-related magazines (SRC)	restful sitting	Normal daily routine		Resting and reading about heroin addiction treatments	Reading	Resting and reading	Sitting (nature documentary watching)	Resting and reading		20 min seated rest	Usual care	Seated rest	no exercise (control)	Stretching	quiet resting			cognitive training		seated rest 20 min	Resistance exercise	Resistance exercise	seated rest	rest
No.	All (counterbalanced design)	25	20		19	All (counterbalanced design)	All (counterbalanced design)	All (counterbalanced design)	21	All (counterbalanced design)	15	all (counterbalanced design)	all (counterbalanced order)		all (counterbalanced design)	20	20			15	16	all			all	all	14		30	all	36	All	all		all	23	all	12	24	all			32		all	18	All	all	all
Group/condition 2					Social gathering				Open-skill exercise								Acute resistance exercise 30 min																					strength training (ST)					no-contact control group			static stretching exercise (control)	Reading (control)
No.					17				23								21																					12					40			18	all
Group/condition 3																																											social control group (relaxation)
No.																																											34
Comments														The control condition was baseline data before intervention light and moderate exercise														Baseline data as comparator						The comparator was the baseline data				ST: hip extension, abdominal crunch, biceps curl, knee flexion, seated lower-leg lift, arm raise, and chair squat.				baseline as comparator		baseline as comparator
Intervention description
Intervention type 1	Ergometer cycling exercise test	Aerobic exercise (i.e. Cycling, jogging, or jump rope)	Motor-driving treadmiling (high-fit participants)	Ergometer cycling	Functional exercise (combinations of exercises that stimulate aerobic endurance, flexibility, muscular resistance, and balance)	Cycle ergometer pedalling	Body-weight exercises	Motor-driven treadmilling	Closed-skill exercise	Semirecumbent stepper	Treadmill running or ergometer cycling	Ergometer cycling	treadmill running	light intensity cycling exercise	treadmill running	ergometer cycling	Ergometer cycling	6 h running	aerobic endurance programme (walking or interval jogging)	Spinning wheel exercise	A combination of aerobic dancing and resistance training	treadmill running	interval cycle exercise on ergometer bicycle	ergometer interval cycling	Moderate intensity exercise (MCE)	Treadmill running	Cycle ergometer (moderate intensity)	Ergometer cycling mild intensity	stationary cycle exercise	treadmill running	cycling pedaling	Ergometer cycling	Treadmill exercise running	Cybercycle riding (normal exercise)	Continous aerobic exercise (CAE) treadmill running	power cycling on stationary bike (moderate intensity)	Treadmill running	Running track (ET)	treadmill og ergometer cycling	treadmill exercise	treadmill exercise	exercise protocol on a bicycle (GXT)	cardiovascular, aerobic, and strength exercises	ergometer cycling 60% HR max	treadmill running high intensity (HIIT)	Ergometer cycling and treadmill running	Cycle ergometry	treadmill running	stationary bicycling
No.	All (counterbalanced design)	25	20	24	14	All (counterbalanced design)	All (counterbalanced design)	All (counterbalanced design)	21	All (counterbalanced design)	15	all (counterbalanced design)	all (counterbalanced order)	all (counterbalanced design)	all (counterbalanced design)	20	25	All	All	15	16	all	all	all	all	all	15	All	30	all	36	All	all	28	all	20	all	12	31	all	30	all	35	all	all	19	all	all	all
Intervention type 2			Motor-driving treadmiling (low-fit participants)											moderate intensity cycling exercise											High-intensity interval exercise (HIIE)		Cycle ergometer (high intensity)	Ergometer cycling moderate intensity						Cybercycle riding (exergaming)	High-intensity interval training (HIIT)	power cycling on stationary bike (high intensity)	Futsal playing							ergometer cycling 75% HR max	treadmill walking moderate intensity (MICE)
No.			20											all (counterbalanced design)											all		15	All						28	all	21	all							all	all
Intervention type 3																												Ergometer cycling hard intensity																ergometer cycling 90% HR max
No.																												All																all
Acute or chronic exercise (authors interpretation)	Acute bout	non stated	acute	Non stated	Non stated	Acute	acute	acute	non stated	acute		acute		acute	acute	acute	acute	not stated	not stated	moderate	acute	acute			acute	acute	not stated	acute		acute	acute		acute	acute	acute	chronic	acute	not stated		single bout 30 min	acute	acute		acute	acute	not stated	acute	acute
Duration (time pr. session, timespan if chronic exercise)	30 min	30 min sessions 3 times pr. week in 12 weeks	33 min	single bout 10 min	60 min three times pr week in 12 weeks	30 min bout	11 min single bout	single bout 30 min	40 min three sessions weekly in 24 weeks	20 min	45 min x 3 pr week for eight weeks	single bout 40 min	single bout 15 min	single bout 25 min	single bout 20 min	20 min	40 min	6 hour	40 min three times weekly in ten weeks	40 min	40 min single bout	30 min single bout	four bouts of 15 min	three bouts of 10 min	single bout 24 min (both MCE and HIIE)	single bout 20 min	40 min 3 times pr. week in 12 weeks	22 min single bout	30 min single bout	30 min single bout	25 min single bout	Single bout 30 min	30 min single bout	single bout 20 min	single bouts CAE: 20 min. HIIT: 9 min	40 min three times pr. week in 12 weeks	futsal: single bout of each 30 min. treadmill: single bout 20 min	50 min traning three times pr week in nine weeks	45 min three times pr. week in eight weeks	acute	single bout 20 min	until volitional exhaustion was reached	4 months, two times per week and 90 minutes per session	10 min single bout	single bout 20 min each condition	40 min three times a week in 16 weeks	single bout 30 min	single bout, see below	single bout 20 min
Exercise composition	5 min of warm-up, a 10 1 min of 80–90% maximal HR (HRmax) interspersed by 1 min of 50–65% HRmax active relax (for a total for 20 min), and 5 min of cool-down	non stated	After a 3-min warm-up on a motor-driven treadmill, the participant performed a 30-min bout of exercise and then 3 min cool-down		10 initial minutes for warm-up exercises (walking and stretching exercises); 15 minutes of locomotion activities (walking, going over obstacles, going up and downstairs, zigzagging, etc); 5 minutes for hydration and a little rest; 15 minutes of tasks that stimulate the other activities of daily living (sitting and standing up, carrying objects, sit-ups, activities with exercise ball, etc); and la…	5-min warm up, a 20-min steady-state exer- cise performed at 60–70% of heart rate reserve, and a 5-min cool down.	Burpees, jumping jacks, mountain climbers and squat jumps with 1 min rest between each exercise	non stated	Each aerobic exercise session involved a 5-min warm-up period, followed by 30 min of continuous bike riding or brisk walking/jogging at an intensity that would maintain the heart rate within the assigned training range, and 5 min of cool-down.	2 minutes of self- paced warm-up followed by 20 minutes of exercise on the semirecumbent stepper. This was followed by a short cool-down until blood pressure sta- bilized.	AE consisted of 45 min of continuous steady-state exercise performed on a treadmill or cycle ergometer	10 min warm up and 30 minutes continuous exercise	non stated	5 min warm-up and 20 min exercise (either light or moderate intensity)	2-min warm-up at a speed of 3 miles per hour (mph), a 16- min main exercise at an intensity of 60–70% (65.8 ± 2.4%) of HRmax achieved during the cardiorespiratory fitness test, and a 2-min cool- down at a speed of 3 mph. The intensity of main exercise was ma- nipulated by adjusting the speed and grade every minute according to participants’ HR responses.	2-min warm-up, 5-min at the adjusted speed and incline to reach the target HR corresponding to an individual’s 60–70% maximum heart rate (HRmax = 220 – age), 10-min running at the target HR, and 3- min cool-down.	After a five-min warm-up, the participant performed a 30-min bout of exercise at moderate intensity and then a five-min cool down was performed.	The participants were instructed to complete the run at self- selected intensity and to drink and eat what and when they liked. The run consisted of six 1-h periods, between which the measurements of EEG, mood, and cognitive perfor- mance were performed	warming up (five to ten minutes), 30 minutes walking or jogging and cool down incl. stretching (five to ten minutes). The jogging program was performed according to an interval endur- ance method with a steady increase of running-time com- pared to walking-time. After five weeks the participants just kept on running without walking intervals in-between	5 min warm-up, 30 min during which they were asked to stay within a predetermined target HR zone, and 5 min of cool down.	3–5 min warm-up session, 30-min of supervised moderate-intensity aerobic dance alternately combined with dumbbell resistance exercises specifically designed for this study, followed by a 3–5 min cool-down session.	aerobic exercise on a motor-driven treadmill in a temperature-controlled room (mean temperature 22 _x0014_C ), which consisted of a 5-min warm-up phase, a 20-min main exercise phase, and a 5-min cool-down phase.	Four bouts of exercise with 10 min break between each session	The duration of one ride was ten minutes, with gradual increase of resistance until reaching the desired value of percentage of maximal pulse and sustaining that value for at le- ast six minutes. Pauses between bouts were 20 min.	5-min warm-up with a small load and followed by 5 min of cool-down	not stated	Each session of the program in- volved stretching of the large muscle groups as warm-up (5 min), aerobic exercise as the main exercise stage (30 min), and stretching of the center-based muscles as cool-down (5 min).	After a no load warm-up for 2 min, the participants performed exercise at each load corresponding to the target HR for 20 min	5-min warm-up, a 20-min main exercise period, and a 5-min cool down	5 min warm-up phase, a 20 min main exercise phase, and a 5min cool-down phase	3-min warm up, 20-min steady-state exercise performed at 60–70% of Maximum Heart Rate, and 2-min cool down.	20-min of exercise at 20% delta with a 5-min warm-up and 5-min cool-down	not stated	not stated	CAE: 2-min warm-up was provided at a speed of 3 mph, followed by 16 min of exercise at an intensity of 60–70% HRmax which was achieved by adjusting the speed and grade at the beginning of every minute. Subsequently, a 2-min cool-down period was given at a speed of 3 mph. HIIT: 1-min warm-up, fol- lowed by three repetitions of 1.5 min running separated by 1 min walking. Following the last interval…	warmed up for 5 min, power cycled for 30 min, and then stretched for 5 min.	not stated	The duration on day 1 was 20 min, which increased by 5 min each session until participants were walking for 50 min in wk 3	Not stated	not stated	20 min of walking on a treadmill that ran at a consistent speed, approximately 25.6–28.8 mph (16–18 km/h). The graded practice was preceded by a warm-up (5 min, 1% grade). The partici- pants spent 5 min at each of the 3% and 4% grades, and the last 5 min was a cool-down phase from 2% grade to 1% grade.	5 min self-paced warm-up period. Each stage was 2 min duration. The initial power output, pedaling frequency, and power output increment were set at 60 watts, 60 revolutions pr minute and 60W every 2 minute, respectively, in sedentary subjects 80 watts, 80 revolutions pr minute and 80W every 2 minute, respectively, in cyclists	The cardiovascular training was conducted using treadmills, bicycle ergometer, and cross trainer which included pulse meter in order to monitor the heart function. The aerobic exercises consisted of a number of easy step and floor movement sequences. The muscular strength exercises were conducted using strength machines.	succesive increase of intensity up to 60%, 75% and 90% of maximal heart rate (HRmax) and holding this level of intensity for six minutes	The HIIT protocol consisted of a 2- min warm-up, 16-min interval exercise with repeated 8 bouts of 1-min running at high intensity, and 2-min cool-down. The MICE protocol consisted of 2-min warm-up, 16-min of walking on a treadmill at moderate intensity, and a 2-min cool-down	5-minute warm-up period, followed by 30 minutes of con- tinuous bike riding or brisk walking/jogging at an intensity that would maintain the heart rate within the assigned train- ing range, followed by 5 minutes of cool-down	a 5-min warm-up, 20 min of moderate-intensity exercise, and a 5-min cooldown.	2 min warm-up period. Upon completion of the warm-up period, subjects exercised at an increasing speed and/or inclination during which they were verbally encouraged. Exercise was terminated on achieving any one of the following criteria: (i) Volitional exhaustion, (ii) HR within 10 bpm of age predicted maximum (220 – Age in years) (Bijlani & Manjunatha, 2011), or (iii) Rating of perceived exertio…	not stated
Intensity (authors goal)	High	Moderate	Moderate	Moderate	Light to moderate	Moderate	High	moderate	non stated (Kategoriseret som moderat)	moderate	Moderate	Vigorous (kategoriseret som moderate)	moderate	Light and moderate	moderate	moderate	moderate	not stated OBS kom tilbage til denne (kan ikke kategoriserer træningsintensitet)	non stated	Moderate	moderate	Moderate	moderate	not stated (Min kategorisering: moderat og hård)	MCE: moderate. HIIE: high	moderate	Moderate and high	mild, moderate and high	Vigorous (kategoriseret som moderate)	moderate	moderate	High	Vigorous (hard: egen kategorisering)	moderate	CAE: not stated. HIIT: high	moderate and high	Moderate (both conditions)	moderate	moderate	not stated (kategoriseret som moderate)	moderate	Kom tilbage, ingen kategorisering	not stated	not stated (kategoriseret som moderate og hard)	high and moderate	not stated (kategoriseret som moderate)	moderate	not stated (Kategoriseret som hard)	moderate
Intensity scale (authors definition)	HR monitoring: 80-90% of HRmax (workload calibrated according to steady state HR in initial cycling test).	HR monitoring: (65-75% of the indirect HR max, defined as 206,9 - 0,67 x age)	HR monitoring: 60% of the individual VO2max value, as determined for each individual from the Graded exercise test.	The pedaling rate was kept at 60 rev á min^-1 and the brake pressure was adjusted mechanically from an initial 1 kPa (60 W) to maintain a HR of 130±150 beats á min^-1	Non stated	20-min steady-state exer- cise performed at 60–70% of heart rate reserve	Not stated	HR monitoring: 60% of HR max (determined by Balke protocol on a previous visit)	exercise intensity corresponding to 50–60% of the individual target heart rate reserve (HRR) during the first 2 weeks and 70–75% of the HRR for the remainder of the program.	exercise on the semirecumbent stepper at the level of resistance cor- responding with 45%-55% of HR reserve during the submaximal exercise test (moderate intensity)	HR monitoring: exercise performed on a treadmill or cycle ergometer at a prescribed moderate-intensity corresponding to 40–65% of HR reserve (HRR), which was determined from HR recorded during the initial baseline fitness test.	HR monitoring: training heart rate range (THRR) of 65–70% of heart rate reserve (HRR).We subtracted the resting heart rate (RHR) from the mean Maximal Heart Rate (mHRMAX) to es- timate the HRR.	exercise intensity was set at 50% of their peak oxygen intake (not stated how this was monitored)	HR monitoring: The work rate corresponding to 30% (light exercise) and 50% VO2max (moderate exer- cise) on the GXT (graded exercise test)	HR monitoring: 60–70% (65.8 ± 2.4%) of HRmax achieved during the cardiorespiratory fitness test prior to intervention	HR monitoring: HR corresponding to an individual’s 60–70% maximum heart rate (HRmax = 220 – age)	HR monitoring: 65–75% of the individual target heart rate reserve (HRR), as determined for each individual from the HRrest and HRmax (i.e., 220-age)		The training was heart rate oriented, so that it was realized in the aerobic area. This means that each person had been communicated a pulse rate area which the participants shouldn’t surpass.	The target HR zone corresponded to 70–85% of the indi- vidual maximal HR [estimated as (220 – age),	HR monitoring: corresponding to 55% of the individual target HR reserve (HRR). Target exercise HR = [(220−age)−HR rest] × 50% + HR rest	HR monitoring: 65%-75% of the participant’s age-predicted HRmax and this was maintained during the main exercise phase.	HR monitoring: Exercise intensity was set to maintain a heart rate (HR) of approximately 130 bpm (~67% HR max)	HR-monitoring: each bout at a different intensity (first: 60% of HR max, second: 75% and third: 90%). No information on how HR max was measured.	MCE: HR-monitoring, The MCE workload was determined individually for each partici- pant according to PVT2. MCE was performed with a constant load (continuous effort) of about 80% PVT2. HIIE: The HIIE workload was determined individually for each participant according to PVT1, PVT2 and Pmax. The HIIE consisted of 3 min of effort with a load exceeding PVT2 by about 25% of the difference between Pma…	HR-monitoring: 70% of age-predicted (220-age) maximum heart rate (HRduring exercise = 138.8 ± 11.0 bpm)	HR-monitoring: the moderate-intensity group needed to reach 65–75% of the indirect maximum heart rate (HRmax) during exercise, and the high-intensity group needed to reach 75–85% of the HRmax. HRmax values were calculated as 206.9–0.67 × age.	Target HRs equivalent to an RPE of 11 (fairly light: light exercise), 13 (somewhat hard: moderate exercise), and 15 (hard: hard exercise) were calculated individually for each participant from their regression lines of RPE versus HR in the GXT, respectively.	HR-monitoring: 70–80% of their maximum HR (HR max = 206.9–0.67 × age)	HR monitoring: Participants were instructed to run at 2.5 mph on a motor-driven tread- mill that gradually increased in speed to reach the target 65–75% heart rate reserve (HRR) during the 20min main exercise phase. The HRR for each participant was estimated using the single-stage submaximal treadmill walking test in previous visit	HR monitoring: 60–70% of Maximum Heart Rate. No information on how HR max was found.	exercise at 20% delta. (The resistance equivalent to 20% delta (Δ; difference between GET and VO2peak), which is considered high-intensity exercise). GET=non-invasive estimate of the blood lactate threshold.	participants were in- structed to exercise at a level that was “somewhat hard” to “hard” on the 16-point (from 6 to 20) Ratings of Perceived Exertion (RPE) scale (Borg, 1970). This intensity derived a mean HR (M􏰕161.0 beats per minute (bpm), S.D.􏰕13.9) of 82.8% of their maximal HR achieved on the GXT (M􏰕194.5 bpm, S.D.􏰕9.8)	HR monitoring: target heart rate to maintain during exercise using the heart rate reserve (HRR) method and were given regular feedback to maintain a relative HRR of 60%	CAE: 60–70% Hrmax, HRmax measured by modified Balke protocol at first visit. HIIT: speed targeting 90% Hrmax	HR monitoring: The heart rate for the high-intensity aerobic exercise was maintained at 80%–85% of the maximum heart rate, and the heart rate for the moderate-intensity aerobic exercise was maintained at 65%–70% of the maximum heart rate. Maximum heart rate was defined as 206.9 − (0.67 × age in years)	in both conditions: 65% HRmax and an RPE of 12–14	HR-monitoring: 70% of heart rate reserve. The training heart rate was monitored by determining the heart rate at the midpoint and end of each training session	HR monitoring: 40–65% to their HR reserve which was determined from the baseline car- diorespiratory fitness assessment.	HR-monitoring: 70% intensity of maximum heart rate (HRmax) achieved on the GXT.	HR-monitoring: 60-90% of the HR max. calculating the maximal heart rate (HRmax) using the following formula: 220 - age.	Measurements of oxygen consumption were made every 20 s (mixing chamber method) during the GXT using a ergospirometer. Determination of VO2max was done according criteria Howley et al. 1995	Intensity of the training units was continuously increased but considered the individual capability of the participants.	60%, 75% and 90% of maximal heart rate (HRmax). No information on how HRmax was assessed.	High: 90% of HRmax (estimated by 220 - age, 88.6 ± 0.6%). Moderate: 70.0 ± 0.5% of Hrmax	HR-monitoring: 50-60% of the indi- vidual target heart rate reserve (HRR, HRmax-HRresting) during the first two weeks and 70-75% of the HRR for the remain- der of the program. The participants’ cardiorespiratory fitness was assessed using the Rockport Fitness Walking Test.	HR-monitoring: 60–70% of maximal heart rate (HR) reserve. Hrmax assessed by submaximal YMCA ergometer test.	not stated	HR monitoring: 50%–75% of the individual’s VO2max. VO2max was measured using a computerized indirect calorimetry system
Comments			EI group divided into two groups according to their fitness level (high and low fit)																				Paradigm and ERP recordings performed in each break		maximal power (Pmax), power at the first and at the second ventilatory threshold (PVT1 and PVT2, respectively)			GXT: graded exercise test. RPE: rating of percieved exertion									RPE: ratings of perceived exertion						physical training group (PTG), cognitive train- ing group (CTG), relaxation training group, (RTG) and a control group (CG)	rest lasting 20 min between each session
Methods
EEG or MEG used	EEG	EEG	EEG	EEG	EEG	EEG	EEG	EEG	EEG	EEG	EEG	EEG	EEG	EEG	EEG	EEG	EEG	EEG	EEG	EEG	EEG	EEG	EEG	EEG	EEG	EEG	EEG	EEG	EEG	EEG	EEG	EEG	EEG	EEG	EEG	EEG	EEG	EEG	EEG	EEG	EEG	EEG	EEG	EEG	EEG	EEG	EEG	EEG	EEG
Cognitive function paradigm
Paradigm 1	Flankers task	Standard Go/No-Go	Modified visuospatial attention task	Odd ball task	Oddball task	Stroop task	Novel gambling task	Three conditions of an AX-continuous perfomance task	Task switching	Modified Eriksen flanker task	Modified flankers task	Discriminative response task	Go-/No-go task	Modified flanker task	Serial N-back task	Flanker task	Flanker task	Chalkboard challenge	Trail making test (TMT) form A and B	Attention network test	Stroop task	Stop-signal task	Go-/No-go task	Odd-ball task	Modified flankers task	Oddball task	2-back task	modified flankers task	Go-/No-go task	Stroop color-word test	stroop color-naming task	Continous performance task (CPT-OX)	Eriksen flanker task	Stroop task	Modified flanker task	Temporal discounting task	Stroop color word conflict task	Oddball task	Flankers task	The task-switching paradigm	facial Go-/No-go task	oddball paradigm	n-back task	Oddball task	Modified flanker task	Task-switching paradigm	Task-switching test	oddball paradigm	Flanker task
Sensory modality (visual, auditory, tactile)	Visual	Visual	Visual	Visual	Auditory	visual	visual	Visual	Visual	visual	Visual	Visual	tactile	Visual	visual	visual	Visual	visual	visual	visual	visual	visual	somatosensory	auditory	visual	visual	Visual	visual	visual	visual	visual	visual	visual	visual	visual	visual	visual	auditory	visual	visual	visual	auditory	visual	auditory	visual	visual	visual	auditory	visual
Recording time after exercise	Within 15 min	non stated	15-20 minutes	Within 10 min	Not stated	15 min	10 min	20,2 ± 6,4min	Within one week after completing 24 weeks of exercise	both 0, 20 min and 40 min after exercise	non stated	right after exercise	5 min	2 min	30 min	once the participants’ heart rate had returned to within 10% of the pre-exercise level	Once the participants' BT and HR had returned to within 10% of baseline levels (on average about 5 min after a bout of acute exercise)	not stated	not stated	Within 10 minutes	after the participants’ heart rate (HR) had returned to within 10% of pre-exercise levels (mean 28.4 ± 10.8 min)	within 10 min	right after	non stated	10- min period following the cessation of the exercise protocol and only when participants’ HR had returned to rest HR (+/− 10%), and after 3 min of resting EEG recordings	once heart rate returned to within 10% of pre-experimental condition levels ( 4.6 ± 3.0 minutes post exercise)	not stated	3 min	HR returned to within 110% of their resting HR levels	not stated	when their heart rates returned to within 110% of their resting hearts, this process took about 15 min.	30 min	(HR) had returned to within 􏰔10% of their pre-exercise level (M􏰕40.1 min post-exercise, S.D.􏰕13.9)	within 20 min	20 min	not stated	cognitive testing was performed once participants’ HR returned to within 10% of pre-exercise levels.	not stated	not stated	after participants’ HR returned to within 10% of pre-exercise levels (approximately 20–30 min after acute aerobic exercise)	90 min	as soon as body temperature and HR had returned to preexercise levels.	not stated	right after exercise	not stated	not stated	30 min	HR to return to within +10% excess of pre-exercise values.	2.56 min (SD = 0.40 range: 2.00–3.10 min
Authors cognitive measure category (inhibitory/attentional, memory or task switching)	Inhibitory control	Inhibitory	Attentional	Information processing	Not stated		Award processing	Goal maintenance process	Task switching	Attention and inhibition	Cognitive control	Proactive (BP, pN) and early reactive functions (N1, pN1, pP1). Late cognitive function( P3)	inhibitory	inhibitory	working memory	information processing and inhibitory control	Attentional/inhibition	not stated (problem solving)	Information processing		Inhibitory	inhibitory	inhibitory	non stated	Inhibitory	attentional	working memory	attentional	inhibitory	not stated	Attentional	Attention, inhibition, performance monitoring	attentional	not stated	inhibitory	reward processing/decision making	inhibitory	not stated	cognitive control	task switching	Inhibitory	attentional	working memory	not stated	inhibitory	task switching	task switching	not stated	The N2 reflects conflict resolution, and the P3 has been linked to stimulus evaluation processes.
ERP outcome measurements	P3 and LPP amplitudes	N2 amplitude	P3 and CNV amplitudes and latencies		P300 amplitude and latency	N1, N2, P3, N450	Reward-related positivity (RewP)	N2 og P3 amplitude and latency	P3 amplitude and latency	P300 amplitude and latency	N2 amplitude	latency and amplitude of BP, pN, N1, pN1, pP1 and P3.	N140 amplitude and latency	P3 amplitude and latency	P3 amplitude and latency	amplitude and latency of P2, N2c, P3	P3 amplitude and latency	latency and amplitude of P2 and N1	CNV amplitude and habituation	P3	P2, N2 and P3 latency and amplitude	P3 and N1 latency and amplitude	N140 and P300 amplitude and latency	P3 amplitude and latency	N2 and P2b amplitude	P3a and P3b amplitude and latency	N1 og P2 amplitude	P3 amplitude and latency	N2 and N2d amplitude and latency	P3 and conflict SP amplitude and latency	P2, N2, P3b, and N450 amplitude and latency	P3, CNV and N2 latency and amplitude	The error-related negativity, error positivity, and N2 amplitude	ERP amplitude (?)	P3 amplitude and latency	N2 and P2 amplitude	P300 amplitude	N1, P2, N2, and P3 latencies and amplitudes	ERN	P3 amplitude and latency	N2 amplitude and latency	P300, P2, N1 and N2 latency and amplitude	P3a and P3b amplitude	P300 amplitude and latency	P3 amplitude and latency	P2 and P3 amplitude and latency	P3b and N1 amplitude	P300 amplitude and latency	N2 and P3 amplitude and latency
Comments				Half of the participants carried out visual task and other half auditory																																			de undersøger også reward processing, skal dette tages med i ekstraktionen? Er RewP også målt ved flankers task?			The paradigm for N400 is without a cognitive component and is therefore not extracted
Paradigm 2		Methamphetamin-related Go/No-Go task		Odd ball task					N-back task										d2-letter cancellation test													Eriksen flankers task							Doors task		neutral go-/no-go task
Sensory modality (visual, auditory, tactile)		Visual		Auditory					Visual										visual													visual							visual		visual
Recording time after exercise		non stated		Within 10 min					Within one week after completing 24 weeks of exercise										not stated													41 min							not stated		90
Authors cognitive measure category (inhibitory/attentional, memory or task switching)		Inhibitory		Infomation processing					Working memory										Attentional													Attention, inhibition, performance monitoring							Reward processing		inhibitory
ERP outcome measurements		N2 amplitude		P300 latency and amplitude					P3 amplitude and latency										CNV amplitude and habituation													P3, CNV and N2 amplitude							RewP		N2 amplitude and latency
Comments				Half of the participants carried out visual task and other half auditory																																					This was used as a comparison to the facial task
Paradigm 3																																Four-choice reaction-time task (fast task)
Sensory modality (visual, auditory, tactile)																																visual
Recording time after exercise																																54 min
Authors cognitive measure category (inhibitory/attentional, memory or task switching)																																Attention, inhibition, performance monitoring
ERP outcome measurements																																P3, CNV and N2 latency and amplitude
Comments
Results
Paradigm 1
Reported effect on ERP from baseline to follow up within-group		Follow-up comparisons indicated larger N2 amplitudes of the exercise group during the post-test compared with those of the pre-test in both Go and Nogo conditions (ps < 0.05), of which the largest N2 amplitude at the Fz electrodes for the exercise group was observed during the post-test (p < 0.05)	CNV: Post hoc tests confirmed that the EIH group showed significantly larger negative-wave areas concerning the motor preparatory process after exercise compared to before exercise for the Fz (-586.33 ± 417.74 vs. -430.49 ± 437.22 μVms, p = .005) and Cz (-867.37 ± 506.57 vs. -658.90 ± 557.23 μVms, p = .001) electrodes, but the EIL group only showed significantly larger negative-wave values after …	No significant results		For P3 amplitude, the three-way ANOVA revealed significant main effects for treatment, with larger ampli- tude following exercise relative to control (13.95 6 1.06 vs. 12.84 6 1.04 lV). For N450 latency, the three-way ANOVA revealed a significant main effect for treatment, with shorter latency following exercise compared with control (435.23 6 4.50 vs. 448.31 6 5.91 ms). exercise resulted in less…	A reduced reward positivity was observed in the Post-HIIE condition. This effect was verified by a repeated measures ANOVA (F(1,20) = 6.43, p < .05) that demonstrated an in- teraction between experimental condition (HIIE versus control) and time (Pre versus Post). In other words, the reward positivity amplitude was reduced Post-HIIE (−2.0 uV [−0.3–3.8]) re- lative to Pre-HIIE (3.9 uV [2.2 5.6]) (…	Although P3 latency remained stable, increases in P3 amplitude were observed across all conditions for probes of AY trials at Cz and CPz sites, t(36) ≥ 2.9, p ≤ .01, d ≥ .33, and for AY and AX trials at the Pz site (see Fig. 2), t(36)≥2.6, p≤.015, d ≥ .30, when compared to the non-exercise control session.	no significant difference was observed with regard to any main effect or interaction in the P3 latency. Both the open- and closed- skill groups exhibited significantly larger P3 amplitudes [open- skill: F(1, 21) = 32.99, p < 0.001; closed-skill: F(1, 20) = 23.34, p < 0.001] across all three conditions and electrodes after the intervention relative to baseline.			post hoc comparisons indicated that in the VIAE session, the N1 amplitude was larger (p = 0.012) in the pre-test (−3.32 ± 0.28 μV) than in the post-test (−2.83 ± 0.21 μV). In the control condition, no significant differences were detected (pre-test: −3.37 ± 0.41 μV; post-test: −3.49 ± 0.39 μV). No other significant results in regard to evoked potentials.	Further analysis of Time on each Condition, Stimulus, and Electrode showed that the amplitude of no-go-N140 was more negative after exercise than before exercise at Fz (F(1,18) = 5.022, P < 0.05, 2 = 0.22) and Cz (F(1,18) = 5.638, P < 0.05, 2 = 0.24)	P3 amplitude analysis revealed an Age × Exercise interac- tion, F(2, 44) = 6.28, p = .004, with follow-up tests indicat- ing that a significant main effect for Exercise was observed only for the younger group, F(2, 22) = 6.78, p = .005. Tukey’s HSD post hoc analysis indicated that P3 amplitude following moderate exercise was larger than during the baseline session for the younger group, t(1, 11) …		P2: Post hoc analyses showed an increase in amplitude from pre-test to post-test for the exercise group (p < .01), but not for the control group. N2c: Post hoc analyses showed an increase in amplitude from pre-test to post-test for the ex- ercise group (p < .01), but not for the control group (p = .79). P3: Post hoc analyses showed an increase in amplitude from pre-test to post-test for the exerc…	Post-hoc analysis showed that the P3 amplitudes were significantly larger post-exercise than pre- exercise at all electrodes and conditions in the AE and RE groups (al- most all ps < 0.007)	No significant results	After the training, there was a significant reduction of the iCNV ampli- tude (t(30)=−1.98; p=.03 with M1=−2.83 and M2=− 2.08) and a significant increase of the iCNV habituation (t(30) = 2.21; p = .02 with, M1 = .02 and M2 = −.36) com- pared with the parameters obtained before the training (in both paradigms?)		N2 latency: the post-hoc analyses revealed that, when compared to the pre-test, the N2 latency in the EG was significantly shorter post-test in both the congruent (pre- vs.post-test: 277.19 ± 78.97 ms vs. 249.25 ± 64.51 ms, p < 0.001) and incongruent (pre- vs. post-test: 278.84 ± 79.36 ms vs. 253.94 ± 67.47 ms, p < 0.001) conditions. In contrast, the N2 latency was significantly longer post-test …		Post-hoc testing for Session showed that the amplitude of Go-N140 was significantly larger in pre than in the post-ex4 session (P < 0.01) under the 20°C condition. The amplitude of No-go-N140 was sig- nificantly larger in the first than in the post-ex3 (P < 0.05) and post-ex4 sessions (P < 0.01) under the 20°C condition. post-hoc testing for Session showed that the latency of Go-P300 was signific…	Follicular fase: After analysis, we found that there is statistically significant effect of resistance of 75% of maximal pulse on latency of P3 wave, We used Bonferroni correction student t test that showed statistically significant increase in latency value above Fz electrode on resistance of 75% of maximal pulse (335.3ms [33.13]) in comparison with state of rest (329,00ms [33.01]). (F=7,211; p<…		Decomposition of the Mode × Time interaction revealed reductions in P3b amplitude between pre- and post-test in the sitting condition, t (33) = 3.2, p = 0.003, d = 0.06; whereas no changes in P3b amplitude were observed between pre- and post-test in the exercise condition, t (33) = 0.2, p = 0.82, d = −0.78. Examination of change in P3b amplitude (Post-test P3b amplitude minus Pre-test P3b amplitu…	analysis showed that the N1 amplitude was significantly decreased in the post-test relative to the pre-test only in the high-intensity exercise group (p = 0.020). Paired t-tests for the study groups revealed that the P2 amplitude during the post-test was marginally reduced re- lative to that during the pre-test in the high-intensity exercise group (p = 0.051), with no significant difference in th…	Larger amplitude after light and moderate exercise compare to the baseline [t (1, 11) ≥ 3.18, p≤0.046]. Exercise Intensity×Compatibility interac- tion [F (3, 33) = 6.74, p = 0.001], with post hoc analyses indi-cating longer latency for the incongruent relative to the neutral trial only during baseline session [t (1, 11) =3.00, p=0.012]. This compatibility difference was not observed following any…	the N2 amplitudes in the exercise group in the heroin No-Go and neutral No-Go conditions were larger during the post-test than during the pre-test (ps < 0.05). N2d amplitudes at Fz, FCz, and Cz in the exercise group were larger during the post-test than during the pre-test (ps < 0.001).	larger P3 amplitudes in the exercise session than the control session (9.84μV versus 8.27 μV, p = 0 04) for both adults and adolescents.	P2: post-test yielded larger amplitude than pre-test in the experiment group, p < 0.001, partial η2 = 0.33, but the amplitude of pre-test and post-test didn’t show a significant difference in the control group, p = 0.13. No other significant results.	CPT-OX: Post-hoc comparisons revealed that the Go P3 amplitude significantly increased after exercise (d = 0.24, p = 0.008) but not after the resting control condition (d = 0.06, p = 0.61)	No significant effects.	Significant main effects of Age and Time were observed, with mean amplitudes lower for older adults than younger adults (b = -2.73, SE = 0.59, t = -4.64, p \ 0.005) and mean amplitude increased from pretest to posttest (b = 0.57, SE = 0.28,t = 2.06,p = 0.04)		P2 amplitudes in the moderate-intensity exercise group after 12 weeks of exercise were significantly greater than those before the exercise (p < 0.001). However, no significant differences were detected in the P2 amplitudes before and after exercise for the control and high-intensity exercise groups. The simple effects analysis indicated that N2 amplitudes in the moderate-intensity exercise group…			no significant results		mean N2 amplitude was significantly reduced after aerobic exercise at the F3, C3,Cz, and C4 channels:( p<.05; F4; p<.01; Fz: p < .005) in the sad no-go condition; however, this effect was not observed in the neutral condition	P300 amplitude was increased significantly post exercise (p<0,003) and p300 latency was decreased significantly (p<0,004) after exercise compared to before. No other significant results.		Signifikante resultater for moderate intensitet sammenlignet med rest (table 1) for amplitude.		v
Reported effect on ERP after intervention between-groups/conditions	Analysis of LPP component amplitude revealed a significant main effect of session [F(1,15) = 6.91, p < 0.05, η2p = 0.32], with larger LPP amplitude observed following the HIIE. There is also a significant main effect of congruency [F(1,15) = 6.69, p < 0.05, η2p = 0.31], with larger LPP amplitude for congruent (12.27 ± 1.56 μV) compared with incongruent (11.10 ± 1.40 μV) task conditions. No signif…				In comparison between the groups FE and HC at baseline, 1-way ANOVA revealed lower P300 amplitude for the FE group at Cz (P = .02, effect size = 1.06) and Pz (P < .01, effect size = 1.41), but no significant differences in latency were detected. After the intervention period, on the other hand, no significant differences in P300 amplitude were observed between FE and HC groups. However, the P300 …				There were significant differences among the three groups after the exercise intervention [F(2, 61) = 6.37; p = 0.003], with post-hoc analysis showing that both open- (5.79 μV) and closed-skill (5.38 μV) groups showed significantly larger P3 amplitudes as compared to the control group (3.50 μV) stage after the intervention (open-skill vs. control: p = 0.004; closed- skill vs. control: p = 0.025);	Tukey post hoc analysis indicated that P300 latency was signifi- cantly shorter 20 minutes postexercise in comparison with 20 minutes postrest in both congruent (465.8 versus 500.0; P = .02) and incongruent (468.0 versus 432.0; P = .003) conditions. P300 am- plitude in the F row was significantly greater 40 minutes postexercise in comparison with 40 minutes postrest (5.6 versus 4.8; P = .007).	significant increases in the congruency effect (incongruent N2 amplitude – congruent N2 amplitude) for the AE group, such that a larger increase in N2 amplitude (more negative) was observed on incongruent trials in the AE group (_x0005_0.68 uV) relative to the PE group (0.01 uV)	In the post-test, the N1 was larger (p = 0.01) in control than in the exercise session. the post hoc analysis re- vealed an earlier peaking of pN1 (p = 0.035) in the post-test of the VIAE condition (Control: pre-test 118 ± 7 ms and post-test: 116 ± 6 ms; VIAE: pre-test 120 ± 8 ms and post-test: 108 ± 6 ms). No other significant results in regard to evoked potentials.	In addition, further analysis for Condition showed that the amplitude of no-go-N140 was more negative after exercise in the exercise condition than that after rest in the control condition at Fz (F(1,18) = 6.733, P < 0.05, 2 = 0.27) and Cz (F(1,18) = 4.553, P < 0.05, 2 = 0.2).		Analysis revealed main effects of Condition and Trial, with AE and the target exhibiting larger P3 amplitude compared to rest condition and the nontarget trial, respectively. No significant results for latency.	N2c: The an- alyses also revealed a larger amplitude in the exercise group compared to the control group in the post-test (p < .05), but not in the pre-test (p = .43). P3: The analyses also revealed a larger amplitude in the exercise group compared to the control group in the post-test (p < .05), but not in the pre-test (p = .89). No significant results in terms of latency were found in any evoke…				exercise group exhibited a larger P3 amplitude than the con- trol group.	No significant effects on P2.	exercise session (12.60 ± 1.68 mV) resulting in a larger P3 amplitude than the control session (7.49 ± 1.31 mV) (F = 13.93, p= 0.002). exercise (390.77 ± 20.22 ms) resulting in a longer P3 latency than control (326.65 ± 14.78 ms) (F = 5.09, p = 0.03),. No significant results on N1.			Follow-up tests revealed that the N2 component was significantly larger after MCE (incongruent minus congruent = − 2.33 ± 1.06 μV) than after HIEE (−1.32 ± 1.16 μV) [p < .001] and after SRC (1.71 ± 0.93 μV) [p = .023], but the magni- tude of the N2 component did not differ between HIIE and SRC. No significant effect on P3.	At post-test, smaller P3b amplitude was observed for the sitting (10.6 ± 5.3 μV) condition relative to the exercise (12.0 ± 6.2 μV) condition, t (33) = 2.0, p = 0.05, d = −0.52. No significant results for P3a			No differences in N2 latency among groups or conditions were observed. the N2d amplitudes at Fz, FCz, and Cz during the post- test were larger in the exercise group than in the control group. the N2d amplitudes for FCz and Cz (ps < 0.05) and N2d amplitude at Fz (p = 0.06) during the post-test were larger and marginally significantly larger, respectively, in the exercise group than in the control …		P2: experiment group (6.99 ± 0.71 μV) yielded a larger amplitude than control group (4.74 ± 0.70 μV) for post-test, p = 0.026. No other significant results.				Post hoc tests showed that P3 amplitude was larger for CAE rela- tive to rest p=.003 and HIIT conditions p < .001. A significant difference was also observed between rest and HIIT, with larger P3 ampli- tude for rest relative to HIITp = .002. Latency: Post hoc tests showed significantly shorter P3 latency following HIIT compared to rest p = .009. No significant difference in P3 latency was observ…		At the frontal midling site (Fz), P300 amplitude was significantly greater after the treadmill (p<0,00001) and futsal (p<0,0001) compared to after seated rest, and was greater after futsal compared to treadmill exercise (p=0,033). Results for the central midline site (Cz) also showed statistically higher P300 amplitude following treadmill exercise (p=0,001) and futsal (p<0,00001) compared to seat…	The latencies of the N1, N2, and P2 components and the amplitudes of the N1P2, P2N2, and N2P3 components differed significantly between groups (p < 0.05). After training, the latencies of the P2 and N2 components at the Fz and Cz sites, decreased significantly, and the amplitudes of the N1P2, P2N2, and N2P3 components at the Fz site and the N1P2 and N2P3 components at the Cz site, increased signi…	no significant results	Mixing effect: Post hoc tests revealed that increased P3 in the exercise condition relative to the rest condition was observed only in the non-switch trials (p = 0.001, d = −0.683) and not in the single trials (p = 0.20, d = −0.182). The P3 latency was shorter in the exercise condition than in the rest condition (F(1,28) = 12.41, p = 0.001, ηp2 = 0.31). In addition, the P3 latency was shorter in …			No ERP effects in the physical and no-contact control groups were found, while a reduction of P3a and P3b was found in the social control group		Post hoc tests revealed that P3 amplitude following MICE (7.7 ± 0.4 μV) was greater compared to the rest (7.0 ± 0.5 μV), t(35) = 2.6, p = 0.012, d = 0.44, and HIIT (6.8 ± 0.4 μV) conditions, t(35) = 2.7, p = 0.011, d = 0.45. No dif- ferences were observed between HIIT and rest conditions, t(35) = 0.6, p = 0.531, d = 0.11. Post hoc tests revealed shorter P3 latency following HIIT (406.7 ± 8.8 ms) …	No significant effects for P2. P3: The post-hoc analysis for the Time × Group interaction showed that the P3 amplitudes were significantly larger post- as compared to pre-exercise across trials and electrodes in the AE [F(1,18)=38.50, p<.001, ηp2=0.68) and RE [F(1.17)=7.62, p=.013, ηp =0.31) groups.	For P3b amplitudes of the global switch, a two-way, global switch–site interaction (F2,58 = 25.56, p < 0.001, 􏱋2p = 0.47) was observed, asso- ciated with a large effect size. There was a main effect of session (F2,58 = 5.18, p = 0.010, 􏱋2p = 0.15), with larger mean P3b amplitudes for both the AE (5.53 ± 0.68 􏱍V) and RE sessions (5.92 ± 0.60 􏱍V) relative to control (4.54 ± 0.64 􏱍V). With regard to…	The omnibus analyses for P300 latency revealed main effects of session, F(1, 9) = 13.18, p < .01, partial g2 = 0.59, with exercise resulting in significantly shorter latency at all three sites (Fz; Cz; Pz p < .05) as compared to the baseline values. The omnibus analyses for P300 amplitude revealed a main effect of session, F(1, 9) = 15.38, p < .01, partial g2 = 0.63 with significantly increased a…	N2: With respect to latency, no significant effects were detected. a significant test time × half interaction was found (F(1,10) = 5.67, MSE = 1.13, partial η2 = 0.362, p = 0.039). This interaction is due to larger N2 amplitude values in the second half of the data after exercising than in the second half at rest. As can be seen in Figure 5, the amplitude difference in the second half between res…
Behavioural perfomance	Significant main effect of session [F(1,15) = 7.61, p < 0.05, η2p = 0.34], with faster reaction time observed following the HIIE condition (481.28 ± 8.69 ms) compared with the control condition (510.29 ± 10.10 ms). The analysis also revealed a significant main effect of congruency [F(1,15) = 266.44, p < 0.001, η2p = 0.95], with faster reaction time for congruent (464.69 ± 7.29 ms) compared with i…	Follow-up comparisons of the three-way interaction revealed that the accuracy of the exercise group in the Nogo condition was higher than that of the control group during the post-test (p < 0.05), and the accuracy of the post-test for both groups was higher than that during the pre-test (ps < 0.01).	Post hoc analyses indicated that, before exercise, the EIH group only responded faster overall than the EIL one; the pre-exercise RTs were slower than the post-exercise ones only for the two EI groups; and the RTs for the valid condition were faster than those for the invalid one for all three groups. In terms of the mean accuracy rate, neither significant main effects of group and time, nor sign…		Not reported	exercise yielding shorter response time than control (444.49 6 7.05 vs. 484.83611.04 ms)	There was a significant effect of time on reaction time performance on the gambling task, such that post-intervention reaction time was significantly faster compared to Pre for both HIIE and Control condi- tions, F(1,20) = 8.73, p < .05 (Table 1). There was no difference in performance accuracy between time points or between conditions.	Post-exercise also exhibited a small, yet significant increase in target trial accuracy (see Fig. 1d), t(36)=2.3, p<.025, d = .32.	the two exercise groups relative to control group showed significantly faster RTs in the switch trials after the exercise intervention [F(2, 61) = 10.31, p < 0.001; open-skill vs. control: p < 0.001; closed-skill vs. control: p = 0.027],. However, the RT facilitation in the non-switch and switch trials post-exercise relative to pre-exercise only emerged in the open-skill group.	No significant results between conditions	(For response accuracy Time x Condition interaction approached significance, F(1,28) = 3.13, p = 0.09, n2p = 0.10, with a 1.4% increase in the AE group rela- tive to a 2.0% decrease in the PE group). Decomposition of the Time x Condition inter- action revealed a significant reduction in RT for the AE group (73.45 ms) relative to an increase in the PE group (13.76 ms)	No significant results	No significant results	Post hoc analyses indicated that across groups, the RT following moderate exercise was shorter than the RT following light exercise, t(1, 23) = 2.83, p = .02, and there was a marginally significant difference fol- lowing moderate exercise compared with the baseline session, t(1, 23) = 2.65, p = .057.	No significant results regarding RT and response accuracy. Analysis revealed a main effect of Condition with decreased SD-RT following AE compared to rest. Analysis revealed a main effect of Condition with decreased CV-RT following AE compared to rest.	Post hoc analyses showed a decrease in the response time from pre-test to post-test for the exercise group (p < .01), but not for the control group (p = .39). The analyses also revealed a shorter response time in the exercise group compared to the control group in the post-test (p < .05), but not in the pre-test (p < .58)	Post-hoc analyses for the Time × Group interaction indicated that the post-exercise RTs were faster than the pre-exercise ones across two conditions for the AE [pre- exercise vs. post-exercise: 625.89 ± 105.49 ms vs. 592.81 ± 71.42 ms; t(24) = 2.39, p = 0.25] and RE [pre-exercise vs. post-exercise: 622.93 ± 120.87 ms vs. 600.68 ± 117.07 ms; t(20) = 2.44, p = 0.24] groups.	No significant results	???	Enhanced reaction speed only on trials with incongruent flankers of the executive control network.	No significant results	Acute exercise induced a shorter stop signal response time (SSRT) as compared to control (t 3.35, p < 0.003); however, the go response time (Go RT) remained unchanged (t -1.06, p > 0.05).	No significant results	not stated	Pairwise comparisons showed that partici- pants after MCE, as compared to HIIE and SRC, revealed smaller con- flict effect in both RT [p = .010; p = .053], respectively] and accuracy [p = .36 and p = .0.39, respectively]. At the same time, participants after HIIE and SRC did not differ in the conflict effect in both RT and accuracy.	No significant results between conditions	analysis showed that d’ was significantly higher for the post-test than for the pre-test in the high-intensity exercise group (p = 0.014). Paired t-tests for the study groups revealed that RTs were significantly shorter in the post-test than in the pre-test for the high-intensity exercise group (p = 0.016), with no significant difference in the other two groups	post hoc analysis for Exercise Intensity indicated that across Compatibility conditions EMG-RT following exercise was shorter than in the baseline session [t (1, 11) ≥ 3.18, p ≤ 0.002]. Compatibility: incongruent/neutral condition. EMG-RT: reaction time	Follow- up analysis indicated that greater accuracies in exercise group during the heroin cue No-Go and neutral cue No-Go conditions in post-test compared with pre-test were observed (ps < 0.001)	Subsequent analyses revealed a significantly shorter reaction time in the exercise session compared to the control session for young adults (481.09ms versus 536.57ms),F(1,19=21.13,p<00001,η2 =053)	No significant results.	No significant results	No significant effects.	The RT data revealed a main effect of time (b = -0.18, SE = 0.01, t = -16.51, p \ 0.005), with participants per- forming faster overall post-exercise than pre-exercise.	Post hoc tests showed longer RT for rest relative to HIIT p < .001, and CAE conditions p = .007. incongruent trials: Post hoc tests showed increased response accuracy following HIIT relative to rest (p=.002) and CAE conditions (p = .004)	the percentage of impulsive choices in the moderate-intensity exercise group post-exercise were significantly lower than those before exercising (p < 0.001). By contrast, there were no significant differences for this measure between pre-exercise and post-exercise in the high- intensity exercise or control groups	RT was significantly faster under the treadmill exercise (p=0,024) and futsal (p=0,002) conditions compared to the rest condition, and there was no difference in RT between the treadmill and futsal condition (p=0,566). Accuracy was not assessed.	not stated	Not stated	The RT following the exercise condition was shorter than the in the rest condition (F(1,28) = 10.89, p = 0.003, ηp2 = 0.28). A marginally significant Condition × Trial interaction (F(1,28) = 3.78, p = 0.062, ηp2 = 0.12) was found, with post hoc tests indicating shorter RTs in the exercise condition than in the rest condition only for the non-switch trials (p = 0.002, d = 0.432) and not for the si…	No significant effects	No significant results	Despite the fact that the interaction session × task × group was nonsig- nificant, the groups differently contributed to the reduc- tion of RTs in the 2 back task between t1 and t2, whereas the physical training group significantly reduced the RTs in the 2-back condition from t1 to t2 (660 versus 623ms; F 1 34 =11 5, p<0 005), no differences between sessions were found in the remaining three grou…	no significant results	RT: Analysis revealed main effects of Condition, F(2, 33)=8.0, p = 0.001, ηp2 = 0.32, and Congruency, F(1, 34) = 422.9, p < 0.001, ηp2 = 0.92, which were superseded by a Condition × Congruency in- teraction, F(2, 33) = 3.4, p = 0.044, ηp2 = 0.17. Decomposition of this interaction revealed a Condition effect for both congruent and incon- gruent trials, Fs(2, 33) ≥ 6.4, ps ≤ 0.004, ηp2 ≥ 0.27, with…	The post-hoc analysis showed that, relative to the pre- intervention, the AE and RE groups exhibited significantly higher ARs [AE: F(1,18)=6.02, p=.025, ηp2=0.25; RE: F(1,17)=5.64, p=.030, ηp2=0.25] across the three trials after the intervention. The post-hoc analysis for the Time × Group × Trial interaction showed that the AE group exhibited significantly faster RTs in the non-switching [F(1,18)…	With regard to RT of the global switch, two-way ANOVA indi- cated a significant main effect of session (F2,58 = 8.98, p < 0.001, 􏱋2p = 0.24), with shorter mean RTs for both the AE and RE sessions (631.75 ± 20.66 ms and 622.24 ± 22.30 ms, respectively) relative to the control session (688.77 ± 24.26 ms). With regard to accuracy of the global switch, a significant main effect of session (F2,58 = 4.…	not stated	no significant results
Other results																																										There were no difference in effects of acute exercise on ERP between low ex and high ex group
Comments	HIIE: high-intensity interval exercise														SD-RT: intraindividual standard deviation. CV-RT: intraindividual coefficient of variation				Jeg forstår generelt ikke resultaterne i den her artikel, det giver ikke mening																			Må indrømme at jeg har haft svært ved at forstå og overskue resultater
Paradigm 2
Reported effect on ERP from baseline to follow up within-group		larger N2 amplitudes were observed in the exercise group during the post-test compared with those during the pre-test in Fz (p < 0.05), and larger N2 amplitudes were observed for Fz and Cz in the exercise group during the post-test compared with those dur- ing the pre-test during the Nogo-MA and Nogo-Neutral condition (p < 0.05)		No significant results					no significant difference was observed with regard to any main effect or interaction in the P3 latency. both the open- and closed-skill groups exhibited significantly larger P3 amplitudes [open-skill: F(1, 21) = 7.59, p = 0.012; closed-skill: F(1, 20) = 16.83, p = 0.001] across all three conditions and electrodes after the intervention relative to baseline.																														No significant results		No significant effects
Reported effect on ERP after intervention between-groups		Follow-up comparisons showed larger N2 amplitudes in the Nogo-MA condition during the post-test in the exercise group compared with those of the control group in Fz (p < 0.05), but this was not observed in the Nogo-Neutral condition.							there were no significant differences among the three groups at baseline [F(2, 61) = 0.02; p = 0.985]; (2) there were significant differences among the three groups after the exercise intervention [F(2, 61) = 6.09; p = 0.004], with post-hoc analysis showing that both open- (4.02 μV) and closed-skill (4.52 μV) groups showed significantly larger P3 amplitudes as compared to the control group (2.17 …
Behavioural perfomance		Follow-up comparisons of the three-way interaction revealed that the exercise group during the post-test exhibited greater accuracy than in the pre-test during the Nogo-MA and Nogo-Neutral conditions (ps < 0.001), but not during the Go-MA and Go-Neutral conditions. During the post-test, greater accuracy for the exercise group compared with that of the control group between the Nogo- MA and Nogo-N…							the two exercise groups significantly increased ARs in the 1-back condition after the exercise intervention [open-skill: F(1, 21) = 4.44, p = 0.047] and closed-skill: [F(1, 20) = 21.45, p < 0.001], and the beneficial AR effect on the 2-back condition only emerged in the closed-skill group [F(1, 20) = 36.59, p < 0.001]
Others results
Comments									AR = accuracy rate. RT = reaction time
Paradigm 3
Reported effect on ERP from baseline to follow up within-group
Reported effect on ERP after intervention between-groups
Behavioural perfomance
Other results
Comments
COIs reported	No COI	No COI	No COI	Not reported	Not reported	not reported	No COI	No COI	No COI	Not reported	No COI	No COI	not reported	not reported	No COI	No COI	not reported	Not reported	No COI	No COI	No COI	not reported	No COI	not reported	not reported	No COI	No COIs	not reported	No COI	No COI	No COI	No COI	not reported	No COI	not reported	No COI	No COI	not reported	no COI	No COI	no COI	not reported	no COI	not reported	No COI	No COI	Not reported	not reported	no COI
Financial support reported	Yes	Not reported	Yes	Not reported	Not reported	not reported	Yes	Not reported	not reported	yes	Yes	No reported	Yes	yes	not reported	yes	yes	Not reported	yes	yes	yes	yes	yes	not reported	yes	yes	yes	yes	yes	yes	yes	yes	not reported	not reported	not reported	not reported	not reported	Yes	yes	yes	yes	not reported	yes	not reported	not reported	yes	yes	not reported	yes
[truncated: 3 more columns]

## Sheet: Ark2
		Comments		Comments		Comments		Comments		Comments				Comments				Comments		Comments		Comments		Comments		Comments		Comments		Comments		Comments		Comments		Comments		Comments		Comments		Comments		Comments		Comments		Comments
	1		2		3		4		5		6		7		8	Comments	9		10		11		12		13		14		15		16		17		18		19		20		21		22		23		24		25
Title	Acute High-Intensity Interval Exercise Improves Inhibitory Control Among Young Adult Males With Obesity		Aerobic exercise training ameliorates craving and inhibitory control in methamphetamine dependencies- A randomized controlled trial and event-related potential study		Impact of acute aerobic exercise and cardiorespiratory fitness on visuospatial attention performance and serum BDNF levels		Effects of aerobic exercise and gender on visual and auditory P300, reaction time, and accuracy.		Effects of Physical Exercise on the P300 of Elderly With Alzheimer’s Disease		Acute exercise has a general facilitatitve effect on cognitive function: A combined ERP temporal dynamics and BDNF study		High-intensity interval exercise impairs neuroelectric indices of reinforcement-learning		Neuroelectric indices of goal maintenance following a single bout of physical activity		Open- and Closed-Skill Exercise Interventions Produce Different Neurocognitive Effects on Executive Functions in the Elderly: A 6-Month Randomized, Controlled Trial		The Acute Effects of Aerobic Exercise on Cognitive Control among People with Chronic Stroke		A randomized trial of aerobic exercise on cognitive control in major depression		A single bout of vigorous-intensity aerobic exercise affects reactive, but not proactive cognitive brain functions		Acute aerobic exercise influences the inhibitory process in the go/no-go task in humans		Acute Effects of Aerobic Exercise on Cognitive Function in Older Adults		Acute effects of aerobic exercise on response variability and neuroelectric T indices during a serial n-back task		Acute moderate-intensity exercise generally enhances neural resources related to perceptual and cognitive processes: A randomized controlled ERP study		An acute bout of aerobic or strength exercise specifically modifies circulating exerkine levels and neurocognitive functions in elderly individuals with mild cognitive impairment		The effect of 6 h of running on brain activity, mood, and cognitive performance		Does an aerobic endurance programme have an influence on information processing in migraineurs?		Antecendent acute cycling exercise affects attention control: an ERP study using attention network test		Effects of Acute Aerobic Exercise Combined with Resistance Exercise on Neurocognitive Performance in Obese Women		Effects of acute aerobic exercise on motor response inhibition: An ERP study using the stop-signal task		Effects of repetitive exercise and thermal stress on human cognitive processing		Event related potentials after acute bouts of exercise at different intensities in female non athletes and their relationship with sex hormones		Moderate-intensity exercise boosts the N2 neural inhibition marker: A randomized and counterbalanced ERP study with precisely controlled exercise intensity
Sequence generation		Cross-over study		No information on how the randomization was done		Participants were allocated according to their fitness levels		Single group		Intervention group and control group was divided according to age, education, stage of AD and sex				Cross-over study		Cross-over study		Sequence generation with drawing envelopes randomly		Cross-over study		Authors state random assignment to groups		Cross-over study		Cross-over study		Cross-over study		Cross-over study		Authors state that the groups a fully randome but the sequence generation is unknown		Authors state that the groups a fully randome but the sequence generation is unknown		Single group study		single group design				Authors state that the groups are randomly assigned but the sequence generation is unknown		Cross-over study		single group study design		single group study design
Allocation concealment				Aerobic exercise		Participants knew whether they recieved intervention (exercise) og control (sedentary)								Cross-over study (no risk of selection bias)				Exercise interventions		Exercise intervention		Exercise intervention		exercise intervention		Exercise intervention		Exercise intervention		exercise intervention		Exercise intervention		Exercise intervention		exercise intervention		Exercise intervention				Exercise intervention		Exercise intervention		exercise intervention		Exervise intervention
Blinding of participants, personnel and outcome assessors		aerobic exercise interventions												Exercise intervention		Exercise intervention		Exercise interventions		Exercise intervention		Exercise intervention		exercise intervention		Exercise intervention		Exercise intervention		exercise intervention		Exercise intervention		Exercise intervention		exercise intervention		Exercise intervention				Exercise intervention		Exercise intervention		exercise intervention		Exercise intervention
Incomplete outcome data										Authors state: Data of those who did not complete at least 75% of the exercise sessions were excluded from the analyses because even though they had participated in the study, the data were not complete and could be a source of bias.				no information		No information		Reasons for incomplete data provided		No missing data		Missing data described		Authors state: We initially had 16 subjects, due to excessive eye blinking during the EEG recording, we excluded one subject from the study. Hence, the number of subjects was reduced to 15		No information		Autors state: Data from six participants (three participants in each group) were discarded due to excessive noise in the electroenceph- alogram (EEG) signal. Thus, all analyses were conducted on the data from 24 participants		Authors state: Two participants had to redo at least one block of the n-back task during one of the experimental condition due to sleepiness. How- ever, statistical analyses with and without these two participants did not lead to different findings, thus results based on the sample of 23 participants were presented in the current study.		authors state: Two additional participants in each group were invited to the study in the case of participant dropout or Electroen- cephalographic (EEG) data collection failures. As none of the partici- pants dropped out and all data were suitable for analysis, the two additional participants were excluded from the analyses in order to have a fully randomized and counterbalanced sample.		No information		No information		Authors state: 28 participants (63.5%) completed the training and the measurements.				All data available (figure 1)		No information		no information		No information
Selective outcome reporting		Not able to find protocol		Not able to find protocol										no protocol		No protocol		No protocol		No protocol		No protocol		No protocol		No protocol		No protocol		No protocol available		No protocol		No protocol		No protocol available		No protocol available				No protocol available		No protocol		no protocol		no protocol
Other sources of bias								No control group																				Nearly counterbalanced								study design: no control group		no control group and performed in migraneurs								no non-exercise comparators		No non-exercise comparators
Overall judgement
[truncated: 28 more columns]
